# Supplementary material for: The Emerging Fish Pathogen Flavobacterium spartansii Isolated from Chinook Salmon: Comparative Genome Analysis and Molecular Manipulation
Source: Front Microbiol. 2017 Nov 30;8:2339. doi: 10.3389/fmicb.2017.02339 (PMC5714932; doi:10.3389/fmicb.2017.02339)
Supplement: Supplementary file 4 [file DataSheet3.XLSX]

## Sheet: Sheet1
Table S3. List of the genome islands predicted in F. spartansii
Genome islands	Start	End	Size	GI Prediction Method	Gene Name	Accession Number	Gene Products
GI-I	829223	852183	22960	Predicted by at least one method
					BHE19_RS06235	WP_017497387.1	biotin synthase BioB
					BHE19_RS06230	WP_083342474.1	cupin
					BHE19_RS06225	WP_070906371.1	hypothetical protein
					BHE19_RS06220	WP_083342487.1	calcium-binding protein
					BHE19_RS06215	WP_070906370.1	hypothetical protein
					BHE19_RS22245	WP_083342473.1	hypothetical protein
					BHE19_RS06205	WP_070906369.1	recombinase RecX
					BHE19_RS06200	WP_070906368.1	hypothetical protein
GI-II	1773395	1837159	63764	Predicted by at least one method
					BHE19_RS02280	WP_083342451.1	ribosome assembly cofactor RimP
					BHE19_RS02275	WP_017498147.1	transcription termination/antitermination protein NusA
					BHE19_RS02270	WP_070905784.1	translation initiation factor IF-2
					BHE19_RS02265	WP_070906556.1	DUF4920 domain-containing protein
					BHE19_RS02260	WP_026110154.1	SPOR domain-containing protein
					BHE19_RS02255	WP_070905783.1	cytochrome C
					BHE19_RS02250	WP_070905782.1	quinol:cytochrome C oxidoreductase
					BHE19_RS02245	WP_017498154.1	molybdopterin oxidoreductase
					BHE19_RS02240	WP_017498155.1	membrane protein
					BHE19_RS02235	WP_026110155.1	cytochrome c
					BHE19_RS02230	WP_026110156.1	hypothetical protein
					BHE19_RS02225	WP_017498158.1	cytochrome c oxidase subunit II
					BHE19_RS02220	WP_017498159.1	cytochrome-c oxidase
					BHE19_RS02215	WP_070905781.1	hypothetical protein
					BHE19_RS02210	WP_070905780.1	virulence factor
					BHE19_RS02205	WP_070905779.1	alpha/beta hydrolase
					BHE19_RS02200	WP_070905778.1	RNA polymerase subunit sigma
					BHE19_RS02195	WP_070905777.1	hypothetical protein
					BHE19_RS02190	WP_017498167.1	Holliday junction branch migration DNA helicase RuvB
					BHE19_RS02185	WP_070905776.1	cytochrome P450
					BHE19_RS02180	WP_017498169.1	tRNA epoxyqueuosine(34) reductase QueG
					BHE19_RS02175	WP_070905775.1	hypothetical protein
					BHE19_RS02170	WP_070905774.1	hypothetical protein
					BHE19_RS00905	None	hypothetical protein
					BHE19_RS00910	WP_035746894.1	membrane protein
					BHE19_RS00915	WP_070905601.1	flagellar motor protein MotB
					BHE19_RS00920	WP_070905602.1	hypothetical protein
					BHE19_RS00925	WP_070905603.1	transposase
					BHE19_RS00930	WP_070905604.1	histidine kinase
GI-III	2248078	2265426	17348	Predicted by at least one method
					BHE19_RS00260	WP_070905494.1	integrase
					BHE19_RS00255	WP_017496722.1	ribosome hibernation protein
					BHE19_RS00235	WP_017496723.1	elongation factor Tu
					BHE19_RS00225	WP_008466927.1	preprotein translocase subunit SecE
					BHE19_RS00220	WP_017496724.1	transcription termination/antitermination factor NusG
					BHE19_RS00215	WP_008466923.1	50S ribosomal protein L11
					BHE19_RS00210	WP_017496725.1	50S ribosomal protein L1
					BHE19_RS00205	WP_017496726.1	50S ribosomal protein L10
					BHE19_RS00200	WP_007807437.1	50S ribosomal protein L7/L12
					BHE19_RS00195	WP_070905493.1	DNA-directed RNA polymerase subunit beta
					BHE19_RS00190	WP_026110014.1	DNA-directed RNA polymerase subunit beta'
					BHE19_RS00185	WP_017496730.1	hypothetical protein
					BHE19_RS00180	WP_017496731.1	peptide chain release factor 3
GI-IV	2426605	2437877	11272	Predicted by at least one method
					BHE19_RS10770	WP_070907102.1	hypothetical protein
					BHE19_RS10765	WP_070907101.1	hypothetical protein
					BHE19_RS10760	WP_070907100.1	hypothetical protein
					BHE19_RS10755	WP_070907099.1	hypothetical protein
					BHE19_RS10750	WP_070907098.1	hypothetical protein
					BHE19_RS10745	WP_070907097.1	hypothetical protein
					BHE19_RS10740	WP_070907096.1	hypothetical protein
					BHE19_RS10735	WP_070907095.1	hypothetical protein
					BHE19_RS10730	WP_070907094.1	tyrosine type site-specific recombinase
GI-V	3048787	3062455	13668	Predicted by at least one method
					BHE19_RS08205	WP_017496511.1	ATP-dependent Clp protease ClpC
					BHE19_RS08200	WP_070906676.1	DNA gyrase subunit A
					BHE19_RS08195	WP_070906675.1	hypothetical protein
					BHE19_RS08190	WP_070906674.1	OsmC family peroxiredoxin
					BHE19_RS08185	WP_070906673.1	chromosome segregation protein
					aroE	WP_070906672.1	shikimate dehydrogenase
					BHE19_RS08175	WP_017496517.1	hypothetical protein
					BHE19_RS08170	WP_070906671.1	aspartate aminotransferase family protein
GI-VI	3097918	3133683	35765	Predicted by at least one method
					BHE19_RS07970	WP_017496553.1	thioesterase
					BHE19_RS07965	None	peptide methionine sulfoxide reductase
					BHE19_RS07960	WP_070906643.1	peptide-methionine (S)-S-oxide reductase
					BHE19_RS07955	WP_070906642.1	DNA mismatch repair protein MutT
					BHE19_RS07950	WP_017496558.1	molecular chaperone DnaK
					BHE19_RS07945	WP_083342520.1	DNA-binding protein
					BHE19_RS07940	WP_070906641.1	recombinase
					BHE19_RS07935	WP_070906640.1	hypothetical protein
					BHE19_RS07930	WP_070906639.1	DNA-binding protein
					BHE19_RS22270	None	cryptochrome/photolyase family protein
					BHE19_RS22265	WP_083342491.1	hypothetical protein
					BHE19_RS07915	WP_083342490.1	deoxyribodipyrimidine photolyase
					BHE19_RS07910	WP_070906635.1	flavin oxidoreductase
					BHE19_RS07905	WP_070906634.1	TIGR03643 family protein
					BHE19_RS07900	WP_070906633.1	oxidoreductase
					BHE19_RS07895	WP_070906632.1	epimerase
					BHE19_RS22260	None	cold-shock protein
					BHE19_RS07890	WP_070906631.1	hypothetical protein
					BHE19_RS07885	None	hypothetical protein
					BHE19_RS07880	WP_070906630.1	hypothetical protein
					BHE19_RS07875	WP_070906629.1	IS6 family transposase
					BHE19_RS07870	WP_070906628.1	DNA alkylation repair protein
					BHE19_RS07865	WP_070906627.1	alkyl hydroperoxide reductase
					BHE19_RS07860	WP_070906626.1	transcriptional regulator
					BHE19_RS22255	None	hypothetical protein
					BHE19_RS07855	WP_070906625.1	hypothetical protein
					BHE19_RS07850	WP_070906624.1	alkene reductase
					BHE19_RS07845	WP_070906623.1	DoxX family protein
					BHE19_RS07840	WP_070906622.1	polysaccharide deacetylase
					BHE19_RS07835	WP_070906621.1	MarR family transcriptional regulator
					BHE19_RS07830	WP_070906620.1	hypothetical protein
					BHE19_RS07825	WP_070906619.1	DNA damage-inducible protein D
					BHE19_RS07820	WP_070906618.1	hypothetical protein
					BHE19_RS22250	WP_083342489.1	hypothetical protein
					BHE19_RS07815	None	hypothetical protein
					BHE19_RS07810	WP_070906617.1	hypothetical protein
					BHE19_RS07805	WP_070906616.1	hypothetical protein
					BHE19_RS07800	WP_070906615.1	hypothetical protein
					BHE19_RS07795	WP_070906614.1	hypothetical protein
					BHE19_RS07790	WP_070906613.1	hypothetical protein
					BHE19_RS07785	WP_070906612.1	hypothetical protein
					BHE19_RS07780	WP_070906611.1	hypothetical protein
					BHE19_RS07775	WP_070906610.1	hypothetical protein
GI-VII	3918101	3951446	33345	Predicted by at least one method
					BHE19_RS20245	WP_070908608.1	conjugal transfer protein TraD
					BHE19_RS20250	WP_070908609.1	conjugal transfer protein
					BHE19_RS20255	WP_070908610.1	conjugal transfer protein TraF
					BHE19_RS20260	WP_070908611.1	conjugal transfer protein TraG
					BHE19_RS20265	WP_070908612.1	hypothetical protein
					BHE19_RS20270	WP_070908613.1	conjugative transposon protein TraJ
					BHE19_RS20275	WP_070908614.1	conjugative transposon protein TraK
					BHE19_RS20280	WP_070908615.1	hypothetical protein
					BHE19_RS20285	WP_070908616.1	hypothetical protein
					BHE19_RS20290	WP_070908617.1	conjugative transposon protein TraM
					BHE19_RS20295	WP_070908665.1	conjugative transposon protein TraN
					BHE19_RS20300	WP_070908618.1	conjugal transfer protein TraO
					BHE19_RS20305	WP_070908619.1	conjugal transfer protein TraQ
					BHE19_RS20310	WP_070908620.1	hypothetical protein
					BHE19_RS20315	WP_070908621.1	hypothetical protein
					BHE19_RS20320	WP_070908666.1	PRTRC system protein B
					BHE19_RS20325	None	hypothetical protein
					BHE19_RS20330	WP_070908622.1	PRTRC system protein C
					BHE19_RS22445	WP_083342612.1	hypothetical protein
					BHE19_RS20335	None	hypothetical protein
					BHE19_RS20340	WP_070908623.1	alpha/beta hydrolase
					BHE19_RS20345	WP_070908624.1	single-stranded DNA-binding protein
					BHE19_RS20350	WP_070908625.1	hypothetical protein
					BHE19_RS20355	WP_070908626.1	hypothetical protein
					BHE19_RS20360	WP_070908627.1	hypothetical protein
					BHE19_RS20365	WP_070908628.1	hypothetical protein
					BHE19_RS20370	WP_070908629.1	hypothetical protein
					BHE19_RS20375	WP_070908630.1	hypothetical protein
					BHE19_RS20380	WP_070908631.1	hypothetical protein
					BHE19_RS20385	WP_070908632.1	hypothetical protein
					BHE19_RS20390	WP_070908633.1	hypothetical protein
					BHE19_RS20395	WP_070908634.1	hypothetical protein
					BHE19_RS20400	WP_070908667.1	hypothetical protein
					BHE19_RS22450	WP_083342607.1	hypothetical protein
					BHE19_RS20405	WP_070908635.1	hypothetical protein
					BHE19_RS20410	WP_070908636.1	hypothetical protein
					BHE19_RS20415	WP_070908637.1	hypothetical protein
					BHE19_RS22455	WP_083342608.1	hypothetical protein
					BHE19_RS20420	WP_070908638.1	hypothetical protein
					BHE19_RS20425	WP_070908639.1	hypothetical protein
					BHE19_RS20430	WP_083342609.1	hypothetical protein
					BHE19_RS20435	WP_070908641.1	plasmid maintenance system antidote protein
GI-VIII	4423032	4486349	63317	Predicted by at least one method
					BHE19_RS17915	WP_070908225.1	preprotein translocase subunit SecA
					BHE19_RS17910	WP_070908224.1	hypothetical protein
					BHE19_RS17905	WP_070908223.1	hypothetical protein
					BHE19_RS17900	WP_017495549.1	hypothetical protein
					BHE19_RS17895	WP_017495548.1	molecular chaperone DnaJ
					BHE19_RS17890	WP_017495547.1	thiol:disulfide interchange protein
					BHE19_RS17885	WP_017495546.1	thiol:disulfide interchange protein
					BHE19_RS17870	WP_035628624.1	recombinase
					BHE19_RS17865	WP_051886155.1	hypothetical protein
					BHE19_RS17860	WP_012026320.1	hypothetical protein
					BHE19_RS17855	WP_026983253.1	hypothetical protein
					BHE19_RS17850	WP_083342586.1	hypothetical protein
					BHE19_RS17845	WP_035628620.1	conjugative transposon protein TraN
					BHE19_RS17840	WP_035628618.1	conjugative transposon protein TraM
					BHE19_RS17835	WP_070908222.1	hypothetical protein
					BHE19_RS17830	WP_035628617.1	conjugative transposon protein TraK
					BHE19_RS17825	WP_081912558.1	conjugative transposon protein TraJ
					BHE19_RS17820	WP_035628614.1	hypothetical protein
					BHE19_RS17815	WP_035628612.1	hypothetical protein
					BHE19_RS17810	WP_070908221.1	conjugal transfer protein TraI
					BHE19_RS17805	WP_070908395.1	group II intron reverse transcriptase/maturase
					BHE19_RS22370	None	hypothetical protein
					BHE19_RS17800	None	conjugal transfer protein TraG
					BHE19_RS17795	WP_070908220.1	hypothetical protein
					BHE19_RS17790	WP_026983241.1	carbamoyl-phosphate-synthetase
					BHE19_RS17785	WP_070908219.1	hypothetical protein
					BHE19_RS17780	WP_070908218.1	hypothetical protein
					BHE19_RS17775	WP_070908217.1	hypothetical protein
					BHE19_RS17770	WP_035628599.1	hypothetical protein
					BHE19_RS17765	WP_035628597.1	histidine kinase
					BHE19_RS17760	WP_035628595.1	histone H1
					BHE19_RS17755	WP_035628594.1	restriction endonuclease
					BHE19_RS17750	WP_035628591.1	hypothetical protein
					BHE19_RS17745	WP_070908216.1	restriction endonuclease subunit R
					BHE19_RS17740	WP_035627427.1	restriction endonuclease
					BHE19_RS17735	WP_081912538.1	N-6 DNA methylase
					BHE19_RS17730	WP_035627429.1	transcriptional regulator
					BHE19_RS17725	WP_035627431.1	SusC/RagA family TonB-linked outer membrane protein
					BHE19_RS17720	WP_035627433.1	RagB/SusD family nutrient uptake outer membrane protein
					BHE19_RS17715	WP_081912539.1	hypothetical protein
					BHE19_RS17710	WP_035627438.1	hypothetical protein
					BHE19_RS17705	WP_083342585.1	hypothetical protein
					BHE19_RS17700	WP_035627442.1	hypothetical protein
					BHE19_RS17695	WP_070908394.1	mobilization protein
					BHE19_RS17690	WP_070908214.1	relaxase
					BHE19_RS17685	WP_035627448.1	conjugal transfer protein TraG
					BHE19_RS17680	WP_035627452.1	hypothetical protein
					BHE19_RS17675	WP_035627454.1	single-stranded DNA-binding protein
					BHE19_RS17670	WP_070908213.1	hypothetical protein
					BHE19_RS17665	WP_035627456.1	hypothetical protein
					BHE19_RS17660	WP_035627458.1	hypothetical protein
					BHE19_RS17655	WP_070908212.1	DNA repair protein
					BHE19_RS22365	None	hypothetical protein
					BHE19_RS17650	WP_035627460.1	ATP-binding protein
					BHE19_RS17645	WP_035627463.1	hypothetical protein
					BHE19_RS17640	WP_070908211.1	hypothetical protein
					BHE19_RS17635	WP_051886096.1	hypothetical protein
					BHE19_RS17630	WP_070908210.1	hypothetical protein
					BHE19_RS17625	WP_035627471.1	hypothetical protein
					BHE19_RS17620	WP_035627473.1	hypothetical protein
					BHE19_RS17615	WP_035627474.1	hypothetical protein
					BHE19_RS17610	WP_083342584.1	hypothetical protein
